# Supplementary material
Source: ML conference proceedings conference paper supplement (https://proceedings.mlr.press/v89/esmaeili19b.html)
Supplement: Supplementary file [file esmaeili19b-supp.pdf]

## A NPMI estimation

We define the probability of word  $i$ ;  $p(w_i)$ , and the joint probability of two words  $w_i$  and  $w_j$   $p(w_i, w_j)$  occurring together as their relative frequency. Let  $N_i$  be the total number of documents where  $w_i$  is present and  $N_{i,j}$  be the total number documents where  $w_i$  and  $w_j$  are both present:

$$p(w_i) = \frac{\sum_{n=1}^N \mathbb{1}[w_i \in x_n]}{\sum_{n=1}^N \mathbb{1}[x_n]} = \frac{N_i}{N} \quad (6)$$

$$p(w_i, w_j) = \frac{\sum_{n=1}^N \mathbb{1}[w_i, w_j \in x_n]}{\sum_{n=1}^N \mathbb{1}[x_n]} = \frac{N_{i,j}}{N} \quad (7)$$

NPMI is typically computed for top  $T$  words for a given topic. The formula for computing NPMI for a given word  $w_i$  is stated as:

$$NPMI(w_i) = \sum_j^{T-1} \frac{\log \frac{p(w_i, w_j)}{p(w_i)p(w_j)}}{-\log p(w_i, w_j)} \quad (8)$$

In order to compute NPMI for a particular topic  $k$ , we compute this value for all  $T$  top words associated to that topic:

$$NPMI_k = \frac{\sum_{i=1}^T NPMI(w_i \in Topic_k)}{T} \quad (9)$$

Finally, we compute the overall NPMI as the average of NPMIs for every topic:

$$NPMI = \frac{\sum_{k=1}^K NPMI_k}{K} \quad (10)$$

## B Top Words

In Figure 7, we show the top 10 words for the datasets.

| $A_1$       |         |           | $A_2$     |         |           | $A_3$     |          | $A_4$       |           |
|-------------|---------|-----------|-----------|---------|-----------|-----------|----------|-------------|-----------|
| cards       | pockets | plantar   | bra       | wrist   | buckle    | watch     | earrings | color       | christmas |
| compartment | cold    | fasciitis | boob      | band    | belt      | watches   | pendant  | love        | birthday  |
| bag         | warm    | feet      | underwire | strap   | leather   | casio     | sterling | compliments | grandson  |
| credit      | weather | walk      | breasts   | plastic | brim      | countdown | chain    | brown       | necklace  |
| laptop      | sleeved | arch      | nipples   | watch   | belts     | invitca   | necklace | colors      | gift      |
| pocket      | chilly  | blisters  | cups      | leather | plastic   | seiko     | ring     | purple      | watch     |
| carry       | shirt   | walking   | straps    | metal   | loop      | stopwatch | earring  | blue        | niece     |
| zippered    | pocket  | pain      | cleavage  | buckle  | velcro    | solar     | cz       | gray        | gifts     |
| compartment | wear    | shoes     | muffin    | velcro  | stitching | atomic    | diamonds | pink        | nephew    |
| pockets     | sleeve  | sole      | fabric    | rubber  | stitched  | battery   | jewelry  | black       | halloween |

  

| $A_1$        |            |          | $A_2$  |           |         | $A_3$         |                | $A_4$ |  |
|--------------|------------|----------|--------|-----------|---------|---------------|----------------|-------|--|
| dr           | colordeau  | dr       | movie  | blu       | life    | war           | score          |       |  |
| frankenstein | sorboone   | paris    | good   | sdh       | society | parenthetical | performance    |       |  |
| grade        | jacques    | staci    | dvd    | audio     | humans  | khz           | performances   |       |  |
| self         | dr         | layne    | watch  | ray       | world   | soldiers      | director       |       |  |
| wow          | universiy  | february | film   | criterion | people  | poll          | role           |       |  |
| 12           | dauphine   | self     | just   | ratio     | man     | troops        | directed       |       |  |
| mti          | versailles | filmthe  | like   | grain     | jesus   | ship          | oscar          |       |  |
| enhancement  | ninja      | harp     | time   | dolby     | christ  | france        | cinemtrpgraphy |       |  |
| 06           | pantheon   | en       | really | dvd       | lives   | pacific       | filem          |       |  |
| stangleove   | turtles    | grade    | movies | transfer  | earth   | german        | quot           |       |  |

Table 7: Top 10 words learned by VALTA for the best 4 aspects: clothing (top), and movies (bottom).
